# Supplementary material for: Unusually high cation-induced fluorescence enhancement of a structurally simple intrinsic fluoroionophore with a donor–acceptor–donor constitution
Source: Royal Society of Chemistry journal article supplement (doi:10.1039/a909899b), 2000-01-01
Supplement: a909899b.doc [file a909899b.doc]

Chemical Communications

Unusually high cation induced fluorescence enhancement of a structurally simple intrinsic fluoroionophore with a donor-acceptor-donor-setup

Knut Rurack, Wolfgang Rettig, Ute Resch-Genger

**Supporting Information**

**Materials.** All the solvents employed were of spectroscopic grade and purchased from Aldrich. Metal perchlorates obtained from Merck, Acros, and Aldrich were of highest purity available and dried in a vacuum oven before use.1 For the determination of the complex stability constants, acetonitrile was distilled from CaH2 prior to use. The starting materials for the synthesis of **3**-**5** were obtained from Lancaster and Aldrich. The chemical structures of the dyes were confirmed by elemental analysis and 1H-NMR and their purity was checked by reversed phase HPLC (HPLC set up from Merck-Hitachi; RP18 column; acetonitrile/water = 75/25 as eluent) employing UV detection (UV detector from Knaur; fixed wavelength at 310 nm). NMR spectra were obtained with a 500 MHz NMR spectrometer Varian Unityplus 500. The melting points (mp) measured with a digital melting point analyzer IA 9100 (Kleinfeld GmbH) are uncorrected.

**Synthesis**. **3**-**5** were prepared by reacting 6‑dimethylamino-2‑methylbenzothiazole (**3**,**4**) or 2‑methylbenzothiazole (**5**) with 4‑*N*-(1,4,7,10‑tetraoxa-13‑aza-cyclopentadecyl)benzaldehyde (**3**) or with 4‑(dimethylamino)benzaldehyde (**4**,**5**) the syntheses being described in more detail in refs2-4.

**Steady-state absorption and fluorescence spectroscopy.** UV/Vis-spectra were recorded on a Carl Zeiss Specord M400/M500 absorption spectrometer and steady-state emission spectra on a Spectronics Instruments 8100 spectrofluorometer. For the fluorescence experiments, only dilute solutions with an optical density (OD) below 0.01 at the excitation wavelength (OD < 0.04 at the absorption maximum) were used in order to avoid reabsorption effects. The relative fluorescence quantum yields (*f*) were determined by adjusting the optical densities of the solutions at the excitation wavelengths to 0.1  0.001 in a 100 mm absorption cell. These solutions were then transferred to a 10 mm fluorescence quartz cell. The fluorescence measurements were performed with a 90° standard geometry, an excitation polarizer set at 0° and an emission polarizer set at 54.7°. Coumarin 1 in ethanol (*f* = 0.5)5 and coumarin 153 in ethanol (*f* = 0.4)5 were used as fluorescence standards. All the fluorescence spectra presented here are corrected for the spectral response of the detection system (calibrated quartz halogen lamp placed inside an integrating sphere; Gigahertz-Optik) and for the spectral irradiance of the excitation channel (calibrated silicon diode mounted at a sphere port; Gigahertz-Optik). The fluorescence quantum yields were calculated from 6 independent measurements and the uncertainties of the measurement were determined to  5 % (for 1.0 > *f* > 0.2),  10 % (for 0.2 > *f* > 0.02), and  20 % (for 0.02 > *f*), respectively.

**Time-resolved fluorescence spectroscopy.** Fluorescence lifetimes (*f*) were measured employing a unique laser impulse fluorometer with ps time resolution described elsewhere.6 The sample was excited with the second harmonic output (LBO crystal) of a regenerative mode-locked argon ion laser-pumped Ti:Sapphire laser at a repetition rate of 4 MHz (reduction by synchronized pulse selection). The fluorescence was collected at right angles (emission polarizer set at 54.7°; monochromator with spectral bandwidths of 4, 8, and 16 nm) and the fluorescence decays were recorded with a time-correlated single photon counting setup and a time division of 5.2 ps chn‑1 (experimental accuracy of  3 ps). The laser beam was attenuated using a double prism attenuator from LTB and typical excitation energies were in the nW to µW range (average laser power). The excitation energies were checked and adjusted with a calibrated Si diode (Model 221 with 100:1 attenuator 2550, Graseby) and an optometer (Model S370, Graseby). In a typical experiment, the pulse peak power was 5  10‑2 W. For example, concerning a typical measurement with excitation at 425 nm the sample was excited with *ca.* 105 photons per pulse. The instrumental response function (IRF) of the system was typically 30 ps (full width at half maximum). Temporal calibration of the experimental setup was checked with pinacyanol in ethanol (*f* = 13 ps  1 ps),7 rose bengal in methanol (*f* = 0.50 ns  0.02 ns),8 and fluorescein 27 in 0.1 *N* NaOH (*f* = 4.50 ns  0.03 ns).9 For the estimation of the color shift (wavelength-dependent temporal response of the detection system) between the instrumental response function and the actual fluorescence decay, the fluorescence of coumarin 153 in ethanol was quenched by saturation with potassium iodide and the resulting decay profiles were recorded at the corresponding emission wavelengths.

The fluorescence decay profiles were analyzed with a PC using the software packages IBH Decay Analysis Software V4.2 (IBH Consultants Ltd.) and Global Unlimited V2.2 (Laboratory for Fluorescence Dynamics, University of Illinois). The accuracy of the fit of the single decays, as judged by reduced chi-squared (*R2*), the autocorrelation function *C(j)* of the residuals, and the Durbin Watson parameter (DW), was always acceptable yielding values of *R2* < 1.2 and DW > 1.8, respectively.

**Complex stability constants.** Complex stability constants were determined from absorption measurements (in 50 or 100 mm absorption cells) by titrating a dilute solution (typically 10‑6 M) of ligand by adding aliquots of metal ion solution (*cM0*-titration). The complexometric titration data were fitted employing eq (1) derived by Bourson et al.10 for complexes showing comparatively high stability constants (when *cM* ~ *cM0* is not valid anymore; *A* – absorption intensity; *cM*, *cL* – free metal, free ligand, and complex concentrations, *cY0* – total concentrations).10

|  | (1) |
| --- | --- |

The reported values are mean values of at least two measurements with correlation coefficients > 0.99.

**References**

1 *Gmelins Handbuch der Anorganischen Chemie. Chor*, 8th ed., VCH: Berlin, 1927.

2 J. L. Bricks, J. L. Slominskii, M. A. Kudinova, A. I. Tolmachev, K. Rurack, U. Resch-Genger and W. Rettig, *J.* *Photochem. Photobiol. A Chem.*, 2000, in press.

3 K. Rurack, J. L. Bricks, J. L. Slominskii, U. Resch-Genger and W. Rettig, to be submitted.

4 L. G. S. Brooker and R. H. Sprague, *J. Am. Chem. Soc.*, 1941, **63**, 3203.

5 K. H. Drexhage, *J. Res. Natl. Bur. Stand.*, 1976, **80A**, 421.

6 U. Resch and K. Rurack, *Proc. SPIE-Int. Soc. Opt. Eng.*, 1997, **3105**, 96.

7 N. Boens, N. Tamai, I. Yamazaki and T. Yamazaki, *Photochem. Photobiol.*, 1990, **52**, 911.

8 D. F. Eaton, *Pure Appl. Chem.*, 1988, **60**, 1107.

9 R. A. Velapoldi and M. S. Epstein, *Luminescence applications in biological, chemical, environmental, and hydrological sciences*, ed. M. C. Goldberg, 1989, ACS Symp. Ser., Vol. 383, ACS, Washington, D. C., p. 98.

10 J. Bourson, J. Pouget and B. Valeur, *J. Phys. Chem.*, 1993, **97**, 4552.
